# Supplementary material for: Effects of system response delays on elderly humans’ cognitive performance in a virtual training scenario
Source: PubMed Central journal article supplement (PMC6549173; doi:10.1038/s41598-019-44718-x), 2019-06-05
Supplement: 41598_2019_44718_MOESM1_ESM.pdf [file 41598_2019_44718_MOESM1_ESM.pdf]

# **Effects of system response delays on elderly humans' cognitive performance in a virtual training scenario**

Maria Wirzberger<sup>1,5</sup>, René Schmidt<sup>2</sup>, Maria Georgi<sup>3,4</sup>, Wolfram Hardt<sup>2</sup>, Guido Brunnett<sup>4</sup>, and  
Günter Daniel Rey<sup>5</sup>

<sup>1</sup>Max Planck Research Group “Rationality Enhancement”, Max Planck Institute for Intelligent Systems, Max-Planck-Ring 4, 72076 Tübingen, Germany

<sup>2</sup>Computer Engineering, Faculty of Computer Science, TU Chemnitz, Straße der Nationen 62, 09111, Germany

<sup>3</sup>Information Science, Faculty of Languages, Literature and Culture, University of Regensburg, Universitätsstraße 31, 93053 Regensburg, Germany

<sup>4</sup>Computer Graphics and Visualization, Faculty of Computer Science, TU Chemnitz, Straße der Nationen 62, 09111 Chemnitz, Germany

<sup>5</sup>Psychology of Learning with Digital Media, Faculty of Humanities, TU Chemnitz, Straße der Nationen 12, 09111 Chemnitz, Germany

Maria Wirzberger and René Schmidt contributed equally

Corresponding author: Maria Wirzberger ([maria.wirzberger@tuebingen.mpg.de](mailto:maria.wirzberger@tuebingen.mpg.de))

```
#####  
### R-Script for creating and saving rotatable 3D-graphs and performing path model analyses ###  
###  
### Dr. Maria Wirzberger ###  
### Max Planck Institute for Intelligent Systems Tübingen, Germany ###  
### maria.wirzberger@tuebingen.mpg.de ###  
###  
### 07/02/2019 ###  
#####
```

```
# Load relevant libraries
```

```
library(lavaan)
```

```
library(car)
```

```
library(rgl)
```

```
# Load dataset
```

```
df_fin <- read.csv("G:/dataset.csv") # replace by adequate paths to dataset file
```

```
### Description of included variables
```

```
# "VP_Nummer" --> participant number
```

```
# "Delay_Dauer" --> length of delay in s
```

```
# "Alter" --> age in years
```

```
# "Geschlecht" --> gender (1 = male, 2 = female)
```

```
# "Geistige_Anforderung" --> mental demands score from NASA-TLX
```

```
# "Koeperliche_Anforderung" --> physical demands score from NASA-TLX
```

```
# "Zeitliche_Anforderung" --> temporal demands score from NASA-TLX
```

```
# "Ausfuehrung_Aufgaben" --> task execution score from NASA-TLX
```

```
# "Anstrengung" --> effort score from NASA-TLX
```

```
# "Frustration" --> frustration score from NASA-TLX
```

```
# "TA_Begeisterung_ges" --> enthusiasm score from affinity for technology questionnaire (TA-EG)
```

```
# "TA_Kompetenz_ges" --> competence score from affinity for technology questionnaire (TA-EG)
```

```
# "TA_pos_Technikfolgen_ges" --> positive perception of technology score from affinity for technology  
questionnaire (TA-EG) ↩
```

```
# "TA_neg_Technikfolgen_ges" --> negative perception of technology score from affinity for technology  
questionnaire (TA-EG) ↩
```

```
# "IP_Produktwahrnehmung_ges" --> product perception score from meCUE
```

```
# "IP_Nutzeremotion_ges" --> user emotions score from meCUE
```

```
# "IP_Konsequenzen_ges" --> use consequences score from meCUE
```

```
# "IP_Gesamturteil" --> system quality score from meCUE
```

```
# "T_ges" --> memory performance in test runs (recall performance; accumulated proportionate amount of  
correctly recalled words without order) ↩
```

```
# "B_ges" --> memory performance in baseline runs (retentivity; accumulated proportionate amount of correctly  
recalled words without order) ↩
```

```
# "U_ges" --> memory performance in training runs (training performance; accumulated proportionate amount of  
correctly recalled words without order) ↩
```

```
# "Delay_Dauer_z" --> length of delay in s, z-standardized
```

```
# "Alter_z" --> age in years, z-standardized
```

```
# "Geschlecht_z" --> gender, z-standardized
```

```
# "TA_Begeisterung_ges_z" --> enthusiasm score from affinity for technology questionnaire (TA-EG),  
z-standardized ↩
```

```
# "TA_Kompetenz_ges_z" --> competence score from affinity for technology questionnaire (TA-EG),  
z-standardized ↩
```

```
# "TA_neg_Technikfolgen_ges_z" --> negative perception of technology score from affinity for technology  
questionnaire (TA-EG), z-standardized ↩
```

```
# "TA_pos_Technikfolgen_ges_z" --> positive perception of technology score from affinity for technology  
questionnaire (TA-EG), z-standardized ↩
```

```
# "T_ges_z" --> memory performance in test runs (recall performance), z-standardized
```

```
# "B_ges_z" --> memory performance in baseline runs (retentivity), z-standardized
```

```
# "U_ges_z" --> memory performance in training runs (training performance), ↩
```

```
z-standardized
```

```
# "IP_Gesamturteil_z" --> system quality score from meCUE, z-standardized
```

```
# "IP_Konsequenzen_ges_z" --> use consequences score from meCUE, z-standardized
```

```
# "IP_Nutzeremotion_ges_z" --> user emotions score from meCUE, z-standardized
```

```
# "IP_Produktwahrnehmung_ges_z" --> product perception score from meCUE, z-standardized
```

```
# "Geistige_Anforderung_z" --> mental demands score from NASA-TLX, z-standardized
```

```
# "Koeperliche_Anforderung_z" --> physical demands score from NASA-TLX, z-standardized
```

```

# "Zeitliche_Anforderung_z" --> temporal demands score from NASA-TLX, z-standardized
# "Ausfuehrung_Aufgaben_z" --> task execution score from NASA-TLX, z-standardized
# "Anstrengung_z" --> effort score from NASA-TLX, z-standardized
# "Frustration_z" --> frustration score from NASA-TLX, z-standardized
# "product_base_delay_z" --> product term for moderation effect retentivity*delay, z-standardized
# "product_age_delay_z" --> product term for moderation effect age*delay, z-standardized
# "product_gender_delay_z" --> product term for moderation effect gender*delay, z-standardized
# "product_begeisterung_delay_z" --> product term for moderation effect enthusiasm*delay, z-standardized
# "product_kompetenz_delay_z" --> product term for moderation effect competence*delay, z-standardized
# "product_positiv_delay_z" --> product term for moderation effect positive perception of technology*delay, z-standardized
# "product_negativ_delay_z" --> product term for moderation effect negative perception of technology*delay, z-standardized
# "plane_Delay_Base_z" --> moderation plane of retentivity*delay for recall performance, z-standardized
# "plane_Delay_Beg_z" --> moderation plane of enthusiasm*delay for recall performance, z-standardized
# "plane_Delay_Komp_z" --> moderation plane of competence*delay for recall performance, z-standardized
# "plane_Delay_Pos_z" --> moderation plane of positive perception of technology*delay for recall performance, z-standardized
# "plane_Delay_Komp_IP_z" --> moderation plane of competence*delay for system quality, z-standardized
# "plane_Delay_Pos_IP_z" --> moderation plane of positive perception of technology*delay for system quality, z-standardized
# "plane_Delay_Komp_Frust_z" --> moderation plane of competence*delay for frustration, z-standardized

# Build and save rotatable graphs (adjust path where graphs are saved if necessary)
# Change to 'fit=""linear" and 'residuals=TRUE' to get linear plane with projections of residuals to surface
scatter3d(plane_Delay_Base_z ~ Delay_Dauer_z + B_ges_z, data=df_fin, xlab="Delay", ylab="Recall performance", zlab="Retentivity", fit=c("smooth", "linear"), axis.scales=TRUE, axis.ticks=TRUE, residuals=FALSE, fogtype="none", surface=TRUE, fill=TRUE, surface.col=c("blue","grey"), surface.alpha=0.4, axis.col=c("black","black","black"))
rgl.snapshot("G:/Recall_Retentivity_Delay.png")

scatter3d(plane_Delay_Beg_z ~ Delay_Dauer_z + TA_Begeisterung_ges_z, data=df_fin, xlab="Delay", ylab="Recall performance", zlab="Enthusiasm", fit=c("smooth", "linear"), axis.scales=TRUE, axis.ticks=TRUE, residuals=FALSE, fogtype="none", surface=TRUE, fill=TRUE, surface.col=c("blue","grey"), surface.alpha=0.4, axis.col=c("black","black","black"))
rgl.snapshot("G:/Recall_Enthusiasm_Delay.png")

scatter3d(plane_Delay_Komp_z ~ Delay_Dauer_z + TA_Kompetenz_ges_z, data=df_fin, xlab="Delay", ylab="Recall performance", zlab="Competence", fit=c("smooth", "linear"), axis.scales=TRUE, axis.ticks=TRUE, residuals=FALSE, fogtype="none", surface=TRUE, fill=TRUE, surface.col=c("blue","grey"), surface.alpha=0.4, axis.col=c("black","black","black"))
rgl.snapshot("G:/Recall_Competence_Delay.png")

scatter3d(plane_Delay_Pos_z ~ Delay_Dauer_z + TA_pos_Technikfolgen_ges_z, data=df_fin, xlab="Delay", ylab="Recall performance", zlab="Positive perception", fit=c("smooth", "linear"), axis.scales=TRUE, axis.ticks=TRUE, residuals=FALSE, fogtype="none", surface=TRUE, fill=TRUE, surface.col=c("blue","grey"), surface.alpha=0.4, axis.col=c("black","black","black"))
rgl.snapshot("G:/Recall_Positive_Delay.png")

scatter3d(plane_Delay_Komp_IP_z ~ Delay_Dauer_z + TA_Kompetenz_ges_z, data=df_fin, xlab="Delay", ylab="System quality", zlab="Competence", fit=c("smooth", "linear"), axis.scales=TRUE, axis.ticks=TRUE, residuals=FALSE, fogtype="none", surface=TRUE, fill=TRUE, surface.col=c("blue","grey"), surface.alpha=0.4, axis.col=c("black","black","black"))
rgl.snapshot("G:/Quality_Competence_Delay.png")

scatter3d(plane_Delay_Pos_IP_z ~ Delay_Dauer_z + TA_pos_Technikfolgen_ges_z, data=df_fin, xlab="Delay", ylab="System quality", zlab="Positive perception", fit=c("smooth", "linear"), axis.scales=TRUE, axis.ticks=TRUE, residuals=FALSE, fogtype="none", surface=TRUE, fill=TRUE, surface.col=c("blue","grey"), surface.alpha=0.4, axis.col=c("black","black","black"))
rgl.snapshot("G:/Quality_Positive_Delay.png")

scatter3d(plane_Delay_Komp_Frust_z ~ Delay_Dauer_z + TA_Kompetenz_ges_z, data=df_fin, xlab="Delay", ylab="Frustration", zlab="Competence", fit=c("smooth", "linear"), axis.scales=TRUE, axis.ticks=TRUE, residuals=FALSE, fogtype="none", surface=TRUE, fill=TRUE, surface.col=c("blue","grey"), surface.alpha=0.4, axis.col=c("black","black","black"))
rgl.snapshot("G:/Frustration_Competence_Delay.png")

```

```

# Analyze data with path models
# Recall performance
model_1A_z <- 'T_ges_z ~ a*Delay_Dauer_z + b*B_ges_z + c*Alter_z + d*Geschlecht_z + e*TA_Begeisterung_ges_z +
f*TA_Kompetenz_ges_z + g*TA_pos_Technikfolgen_ges_z + h*TA_neg_Technikfolgen_ges_z + i*U_ges_z +
j*product_base_delay_z + k*product_age_delay_z + l*product_gender_delay_z + m*product_begeisterung_delay_z +
n*product_kompetenz_delay_z + o*product_positiv_delay_z + p*product_negativ_delay_z
U_ges_z ~ z*Delay_Dauer_z
al := a*z
total := a + b + c + d + e + f + g + h + i + j + k + l + m + n + o + p + (a*z)'
fit_1A_z <- sem(model_1A_z, data = df_fin, estimator="mlm", se="robust", test="satorra.bentler", mimic="Mplus")
summary(fit_1A_z, fit.measures=FALSE, standardized=FALSE, rsquare=TRUE)

# System quality
model_2A <- 'IP_Gesamturteil_z ~ a*Delay_Dauer_z + b*B_ges_z + c*Alter_z + d*Geschlecht_z +
e*TA_Begeisterung_ges_z + f*TA_Kompetenz_ges_z + g*TA_pos_Technikfolgen_ges_z + h*TA_neg_Technikfolgen_ges_z
+ i*U_ges_z + j*product_base_delay_z + k*product_age_delay_z + l*product_gender_delay_z +
m*product_begeisterung_delay_z + n*product_kompetenz_delay_z + o*product_positiv_delay_z +
p*product_negativ_delay_z
U_ges_z ~ z*Delay_Dauer_z
al := a*z
total := a + b + c + d + e + f + g + h + i + j + k + l + m + n + o + p + (a*z)'
fit_2A <- sem(model_2A, data = df_fin, estimator="mlm", se="robust", test="satorra.bentler", mimic="Mplus")
summary(fit_2A, fit.measures=FALSE, standardized=FALSE, rsquare=TRUE)

#Frustration
model_3A <- 'Frustration_z ~ a*Delay_Dauer_z + b*B_ges_z + c*Alter_z + d*Geschlecht_z +
e*TA_Begeisterung_ges_z + f*TA_Kompetenz_ges_z + g*TA_pos_Technikfolgen_ges_z + h*TA_neg_Technikfolgen_ges_z
+ i*U_ges_z + j*product_base_delay_z + k*product_age_delay_z + l*product_gender_delay_z +
m*product_begeisterung_delay_z + n*product_kompetenz_delay_z + o*product_positiv_delay_z +
p*product_negativ_delay_z
U_ges_z ~ z*Delay_Dauer_z
al := a*z
total := a + b + c + d + e + f + g + h + i + j + k + l + m + n + o + p + (a*z)'
fit_3A <- sem(model_3A, data = df_fin, estimator="mlm", se="robust", test="satorra.bentler", mimic="Mplus")
summary(fit_3A, fit.measures=FALSE, standardized=FALSE, rsquare=TRUE)

```
